# Supplementary material for: Adaption and Degradation Strategies of Methylotrophic 1,4-Dioxane Degrading Strain Xanthobacter sp. YN2 Revealed by Transcriptome-Scale Analysis
Source: MDPI journal article supplement (doi:10.3390/ijms221910435), 2021-09-28
Supplement: s1 [file s1]

Table S1 Primers used in quantitative real-time reverse transcriptase-PCR

| Primers        | Sequences                  |
|----------------|----------------------------|
| <i>thmA</i> -F | 5'-CGATACAGCCAGAGACAT-3'   |
| <i>thmA</i> -R | 5'-CGAACGGATGGAGTAGAT-3'   |
| <i>thmB</i> -F | 5'-CGAAGATACCGACGACAT-3'   |
| <i>thmB</i> -R | 5'-CCTTGCCGTTGAAATAGAC-3'  |
| <i>thmC</i> -F | 5'-CGAAGGTGAAGAAGTGAT-3'   |
| <i>thmC</i> -R | 5'-GTCTGCGAGGAGTATTTTC-3'  |
| <i>thmD</i> -F | 5'-AAGACATCATCAACGCCGTG-3' |
| <i>thmD</i> -R | 5'-TGCTCTTCTCGGTCAGACAG-3' |
| <i>thmE</i> -F | 5'-CGTCACCTACAAGTTCCACA-3' |
| <i>thmE</i> -R | 5'-CGGAAGAAACAAGCGGCGAG-3' |
| <i>thmF</i> -F | 5'-CTGCTCCGCCGTCGTAAC-3'   |
| <i>thmF</i> -R | 5'-TGGAAGATCAGGTCGACAGA-3' |
| GE06014-F      | 5'-AAGGTGCCGTCTATGATG-3'   |
| GE06014-R      | 5'-ACTGTCGTCTTGGTGATG-3'   |
| GE05990-F      | 5'-GCCACATTCCACAGTCTT-3'   |
| GE05990-R      | 5'-CAAGCGACGGTTCTCAAG-3'   |
| GE02965-F      | 5'-CTTGCGGATGGCTTCTAC-3'   |
| GE02965-R      | 5'-CCTCTTCCTCGTCCTTGA-3'   |
| GE02036-F      | 5'-ACGCTCTCATGCAACCTG-3'   |
| GE02036-R      | 5'-AGGGCCATCATTCCGGTA-3'   |
| GE05991-F      | 5'-AGTTTTACCGGCTCGACA-3'   |
| GE05991-R      | 5'-TTCTTGCCGCCCATCTCG-3'   |
| GE05994-F      | 5'-AACACCCGGATATCGACA-3'   |
| GE05994-R      | 5'-TCACCCGCTTCATCGTTT-3'   |
| GE02333-F      | 5'-AAGTTCGCCGCCAATCTC-3'   |
| GE02333-R      | 5'-CCAGCACTTCCTTGTCGTAG-3' |
| GE05988-F      | 5'-GGTTCTGCTTGTGATGAG-3'   |
| GE05988-R      | 5'-TTGGTGATGCCGAGATTA-3'   |
| 16S-F          | 5'-TGATAAGCCGAGAGGAAGG-3'  |
| 16S-R          | 5'-CTGTCACCGCCATTGTAG-3'   |
